# Supplementary material for: Electronic structure characterization of an individual single-walled carbon nanotube by in situ electrochemical surface-enhanced Raman scattering spectroscopy
Source: Royal Society of Chemistry journal article supplement (doi:10.1039/c6nr05209f), 2016-01-01
Supplement: c6nr05209f1.pdf [file c6nr05209f1.pdf]

## Electronic Structure Characterization of Individual Single-walled Carbon Nanotube by *in situ* Electrochemical Surface-enhanced Raman Scattering Spectroscopy

Satoshi Yasuda,<sup>a</sup> Shinji Hoshina,<sup>a</sup> Shohei Chiashi,<sup>b</sup> Shigeo Maruyama,<sup>b</sup> and Kei Murakoshi<sup>\*a</sup>

<sup>a</sup>Department of Chemistry, Faculty of Science, Hokkaido University, Sapporo, Hokkaido 060-0810, Japan.

<sup>b</sup>Department of Mechanical Engineering, The University of Tokyo, Bunkyo-ku, Tokyo 113-8656, Japan

E-mail: kei@sci.hokudai.ac.jp

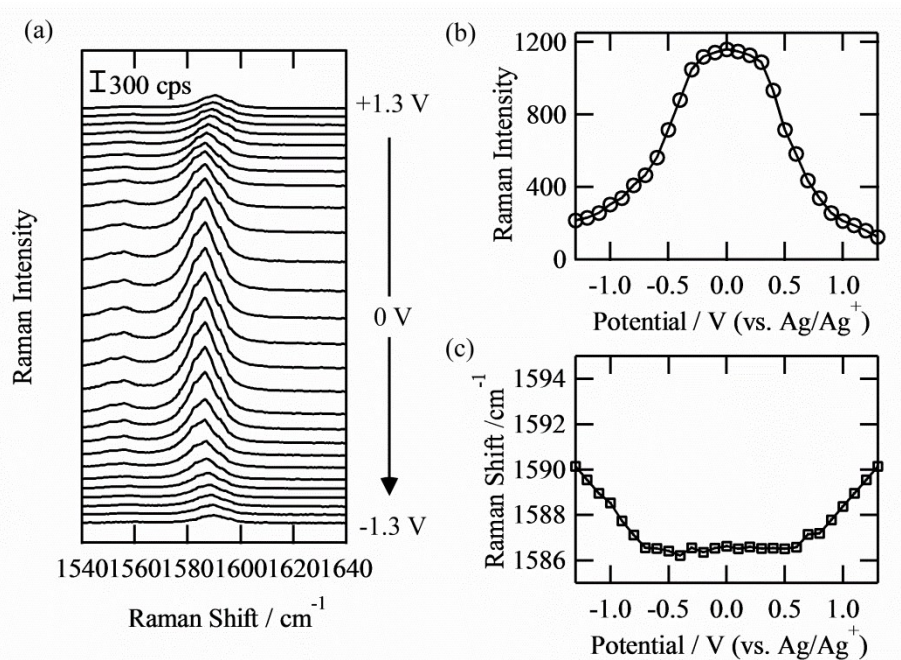

Figure S1. Electrochemical potential dependence of (a) G band Raman spectra, (b) G band intensity and (c) position of the G band peak for an isolated (10, 2) semiconducting SWNT.
